# Supplementary material
Source: PubMed Central journal article supplement (PMC4300304)
Supplement: DS_10.1177_0022034514563334.pdf [file DS_10.1177_0022034514563334.pdf]

# The Specific Role of FAM20C in Dentinogenesis

Journal of Dental Research  
DSI-DS2  
© International & American Associations  
for Dental Research 2014  
Reprints and permissions:  
sagepub.com/journalsPermissions.nav  
DOI: 10.1177/0022034514563334  
jdr.sagepub.com

X. Wang<sup>1</sup>, J. Wang<sup>1</sup>, Y. Liu<sup>1</sup>, B. Yuan<sup>2</sup>, L.B. Ruest<sup>1</sup>, J.Q. Feng<sup>1</sup>,  
and C. Qin<sup>1</sup>

## Appendix

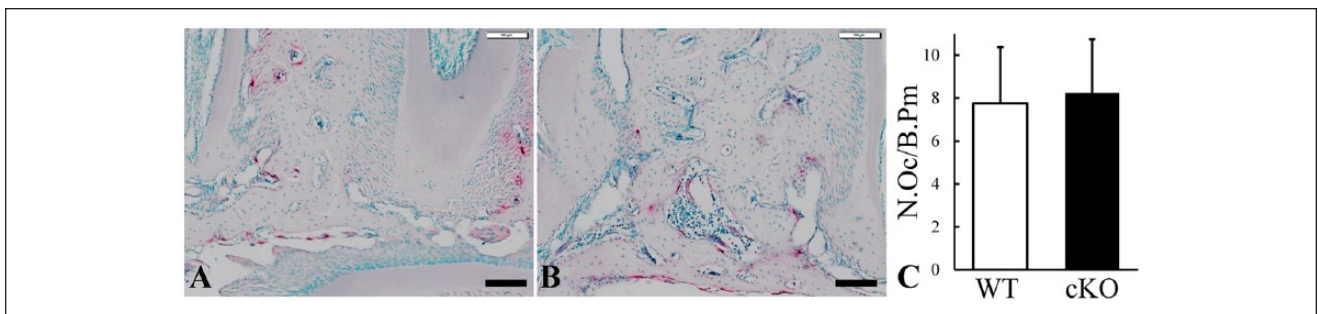

**Appendix Figure.** Tartrate-resistant acid phosphatase (TRAP) staining of alveolar bone from wild-type (WT) and cKO mice. TRAP staining of the alveolar bone from WT (A) and cKO (B) mice showed no significant differences in the numbers of osteoclasts (C). N.Oc/B.Pm: number of osteoclasts per bone perimeter. Scale bars are 100  $\mu$ m.

<sup>1</sup>Department of Biomedical Sciences and Center for Craniofacial Research and Diagnosis, Texas A&M University Baylor College of Dentistry, Dallas, TX, USA

<sup>2</sup>Department of Medicine, University of Wisconsin, and GRECC, Madison, WI, USA

### Corresponding Author:

C. Qin, Department of Biomedical Sciences and Center for Craniofacial Research and Diagnosis, Texas A&M University Baylor College of Dentistry, 3302 Gaston Ave., Dallas, TX 75246, USA.

Email: cqin@bcd.tamhsc.edu

**Appendix Table 1.** Quantitative  $\mu$ -CT Analyses of the Dentin, Alveolar Bone, and Cortical Bone (the midshaft region) of Tibias from 3-wk-old Wild-type (WT) and *Wnt1-Cre;Fam20C<sup>fl/fl</sup>* (cKO) Mice.

| Variables (mean $\pm$ SD)              | Dentin          |                 | Alveolar Bone   |                  | Cortical Bone   |                 |
|----------------------------------------|-----------------|-----------------|-----------------|------------------|-----------------|-----------------|
|                                        | WT (n = 6)      | cKO (n = 6)     | WT (n = 6)      | cKO (n = 6)      | WT (n = 6)      | cKO (n = 6)     |
| BV/TV                                  | 0.47 $\pm$ 0.03 | 0.44 $\pm$ 0.03 | 0.83 $\pm$ 0.10 | 0.69 $\pm$ 0.08* | 0.98 $\pm$ 0.12 | 0.98 $\pm$ 0.14 |
| Apparent density (mg/cm <sup>3</sup> ) | 1207 $\pm$ 18   | 1047 $\pm$ 16*  | 910 $\pm$ 16    | 752 $\pm$ 12*    | 897 $\pm$ 14    | 881 $\pm$ 15    |
| Material density (mg/cm <sup>3</sup> ) | 1607 $\pm$ 25   | 1469 $\pm$ 21*  | 1060 $\pm$ 18   | 966 $\pm$ 16*    | 950 $\pm$ 16    | 946 $\pm$ 15    |

BV/TV, ratio of bone volume (BV) to total volume (TV); Apparent density (expressed as milligram of mineral/cm<sup>3</sup>), average mineral density within the segmented area of all voxels thresholded as bone; Material density (expressed as milligram of mineral/cm<sup>3</sup>), average mineral density of all voxels segmented as bone including voids; \*significant difference from WT mice ( $P < 0.05$ ).

**Appendix Table 2.** Real-time PCR of *AMBN*, *AMEL*, *ENAM*, *RANK*, and *RANKL* with RNA Extracted from the Incisor and Alveolar Bone of 1-wk-old Mice.

| mRNA Levels (folds)<br>(mean $\pm$ SD) | WT (n = 6) | <i>Wnt1-Cre;</i><br><i>Fam20C<sup>fl/fl</sup></i> (n = 6) |
|----------------------------------------|------------|-----------------------------------------------------------|
| <i>AMBN</i>                            | 1          | 1.05 $\pm$ 0.16                                           |
| <i>AMEL</i>                            | 1          | 0.97 $\pm$ 0.13                                           |
| <i>ENAM</i>                            | 1          | 0.94 $\pm$ 0.18                                           |
| <i>RANK</i>                            | 1          | 1.07 $\pm$ 0.26                                           |
| <i>RANKL</i>                           | 1          | 1.15 $\pm$ 0.28                                           |

A  $P$  value of  $< 0.05$  was taken as a statistically significant difference. The mRNA expression levels of *AMBN*, *AMEL*, *ENAM*, *RANK*, and *RANKL* in the incisor and alveolar bone of the *Wnt1-Cre;Fam20C<sup>fl/fl</sup>* mice were not statistically significantly different from those of WT mice.
